# Supplementary material for: Benzothiazole appended 2,2′-(1,4-phenylene)diacetonitrile for the colorimetric and fluorescence detection of cyanide ions
Source: Royal Society of Chemistry journal article supplement (doi:10.1039/d2ra03702e), 2022-01-01
Supplement: d2ra03702e1.pdf [file d2ra03702e1.pdf]

## **Benzothiazole appended 2,2'-(1,4-phenylene)diacetonitrile for the calorimetric and fluorescence detection of cyanide ions**

Dhanapal Jothi<sup>a</sup>, Sathishkumar Munusamy<sup>b</sup>, Saravanakumar Manickam<sup>c</sup>, Saravanan

Enbanathan<sup>a</sup>, Selin Manojkumar<sup>a</sup> and Sathiyarayanan Kulathu Iyer<sup>a\*</sup>

<sup>a</sup>Department of Chemistry, School of Advanced Sciences and Vellore Institute of Technology, Vellore-632014, India. \*E-mail: [sathiya\\_kuna@hotmail.com](mailto:sathiya_kuna@hotmail.com)

<sup>b</sup>Department of Chemistry, Faculty of Science, Chulalongkorn University, Phayathai Rd., Pathumwan, Bangkok, 10330, Thailand. E-mail: [pra3sat@gmail.com](mailto:pra3sat@gmail.com)

<sup>c</sup>Department of Chemistry, Saveetha School of Engineering, Saveetha Institute of Medical and Technical Sciences, (SIMATS), Chennai -602105, Tamil Nadu, India.

### **Table of contents**

|                                                                                                                                                          |               |
|----------------------------------------------------------------------------------------------------------------------------------------------------------|---------------|
| <b>Fig S1</b> <sup>1</sup> H NMR spectra of <b>PDBT</b> .                                                                                                | <b>S2</b>     |
| <b>Fig S2</b> <sup>13</sup> C NMR spectra of <b>PDBT</b> .                                                                                               | <b>S2</b>     |
| <b>Fig S3</b> HRMS spectra of <b>PDBT</b> .                                                                                                              | <b>S3</b>     |
| <b>Fig S4</b> . The linear plot of absorption intensity against the concentration of CN <sup>-</sup> from 1 to 20 μM in ACN/H <sub>2</sub> O (1:1, v/v). | <b>S3</b>     |
| <b>Fig S5</b> . Job's plot for determining the binding stoichiometry of <b>PDBT</b> and CN <sup>-</sup> ions.                                            | <b>S4</b>     |
| <b>Fig S6</b> HRMS spectra of <b>PDBT+CN<sup>-</sup></b> .                                                                                               | <b>S5</b>     |
| <b>Fig S7</b> . Optimized structures of <b>PDBT</b> and <b>PDBT+CN<sup>-</sup></b> .                                                                     | <b>S5</b>     |
| <b>Table S1</b> . Oscillator strengths of important transitions for the <b>PDBT</b> and <b>PDBT + CN<sup>-</sup></b> .                                   | <b>S5</b>     |
| <b>Fig S8</b> . Individual electronic spectra of <b>PDBT</b> with various selective anions.                                                              | <b>S6-S12</b> |
| <b>Fig S9</b> . Standard deviation calculation spectra of <b>PDBT</b> .                                                                                  | <b>S12</b>    |

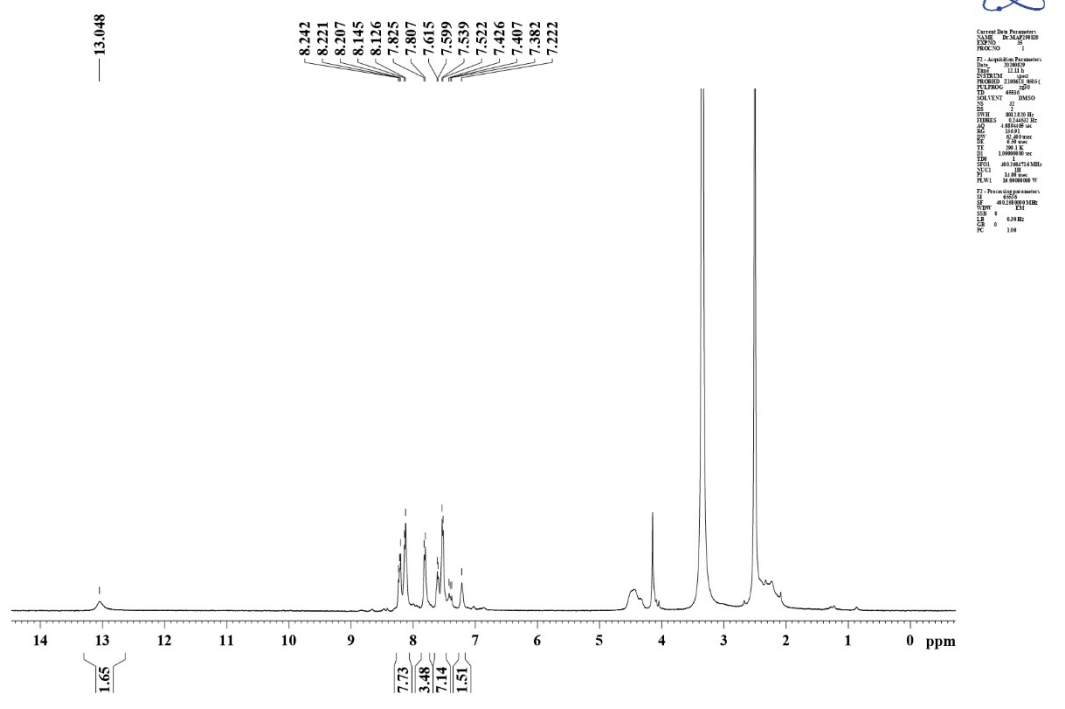

Fig S1 <sup>1</sup>H NMR spectra of PDBT.

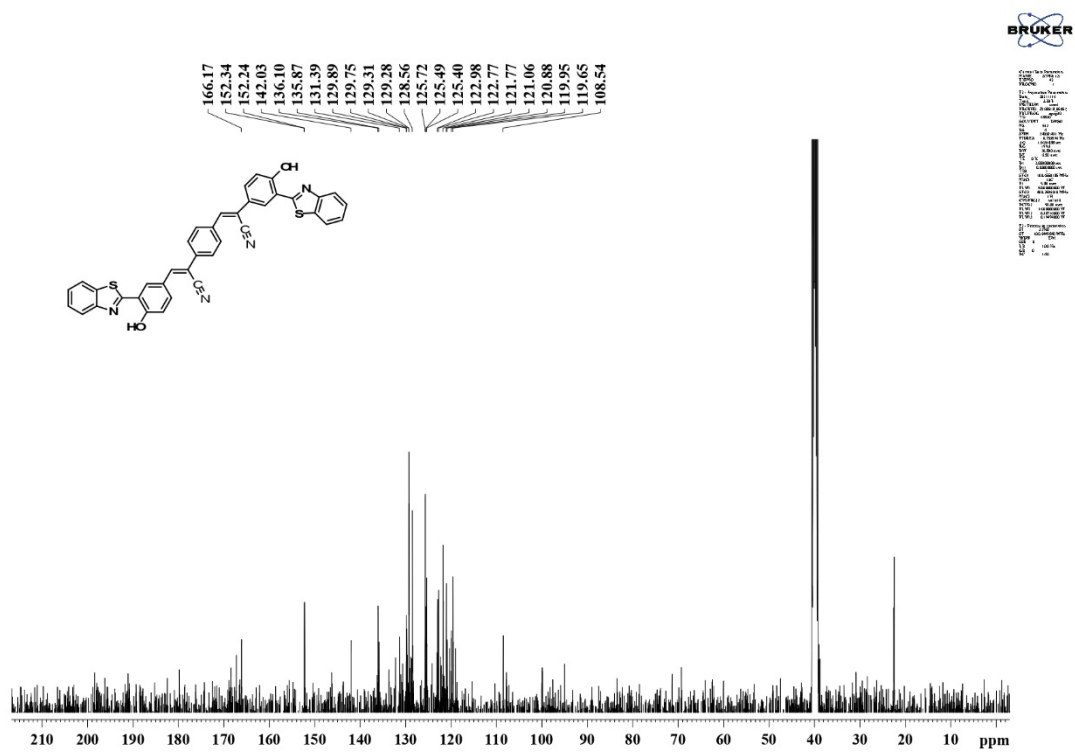

Fig S2 <sup>13</sup>C NMR spectra of PDBT.

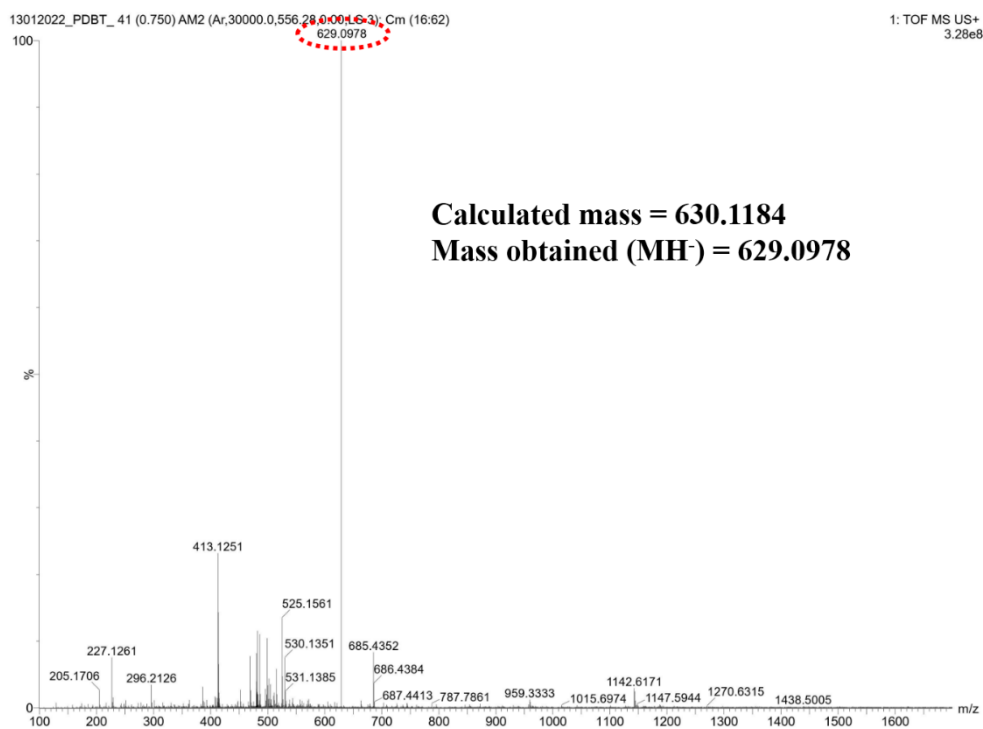

Fig S3 HRMS spectra of PDBT.

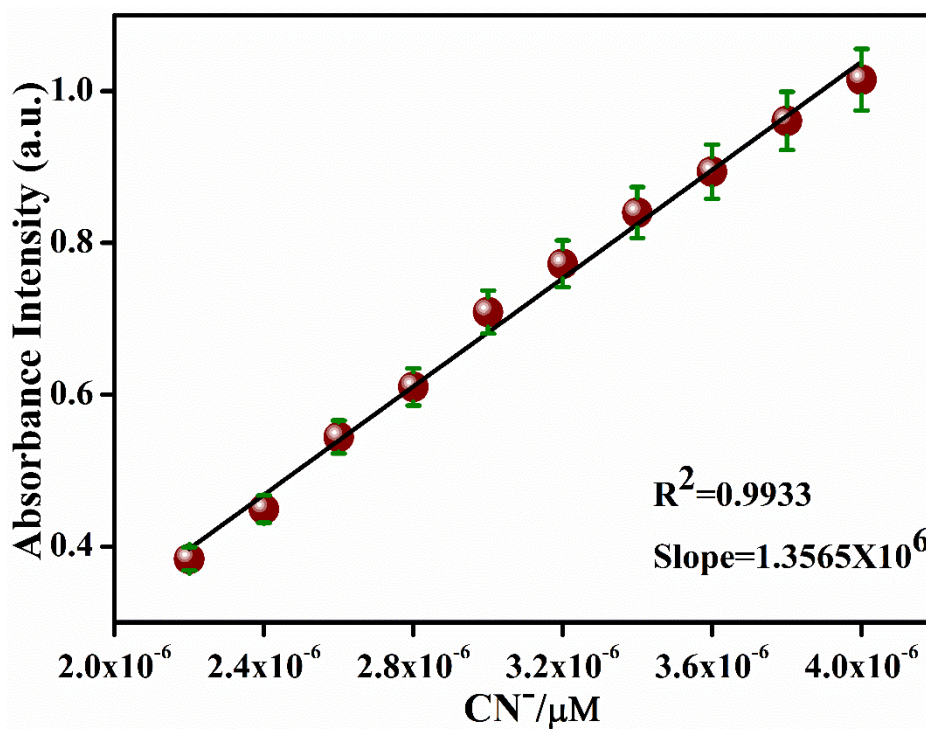

Fig S4. The linear plot of absorption intensity against the concentration of CN<sup>-</sup> from 1 to 20 μM in ACN/H<sub>2</sub>O (1:1, v/v).

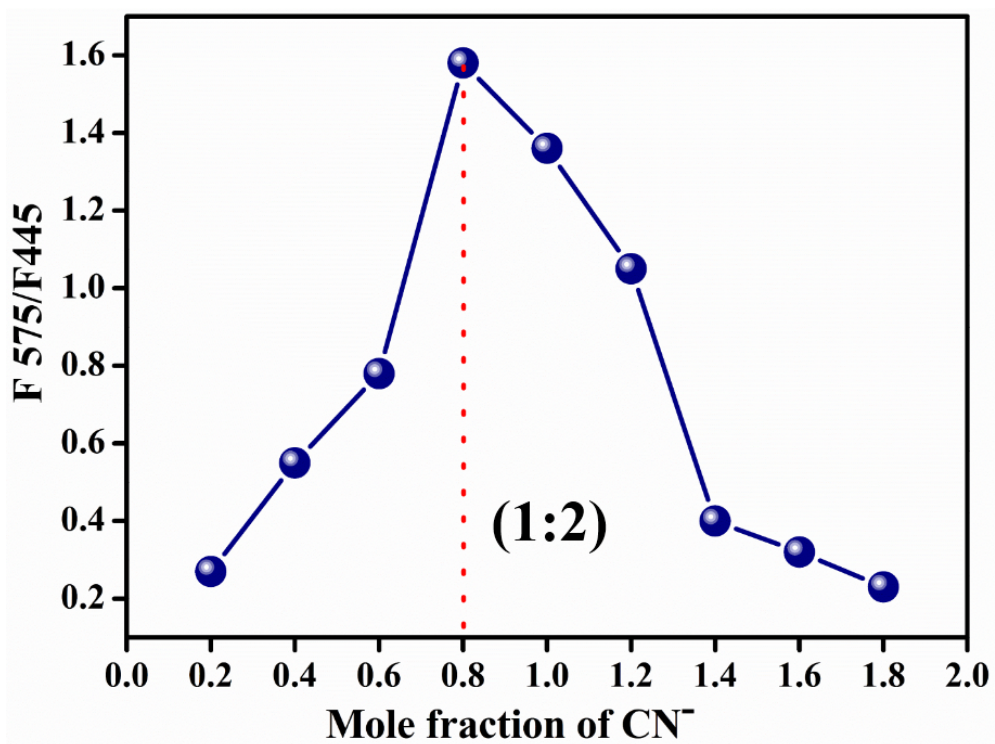

Fig S5. Job's plot for determining the binding stoichiometry of **PDBT** and CN<sup>-</sup> ions.

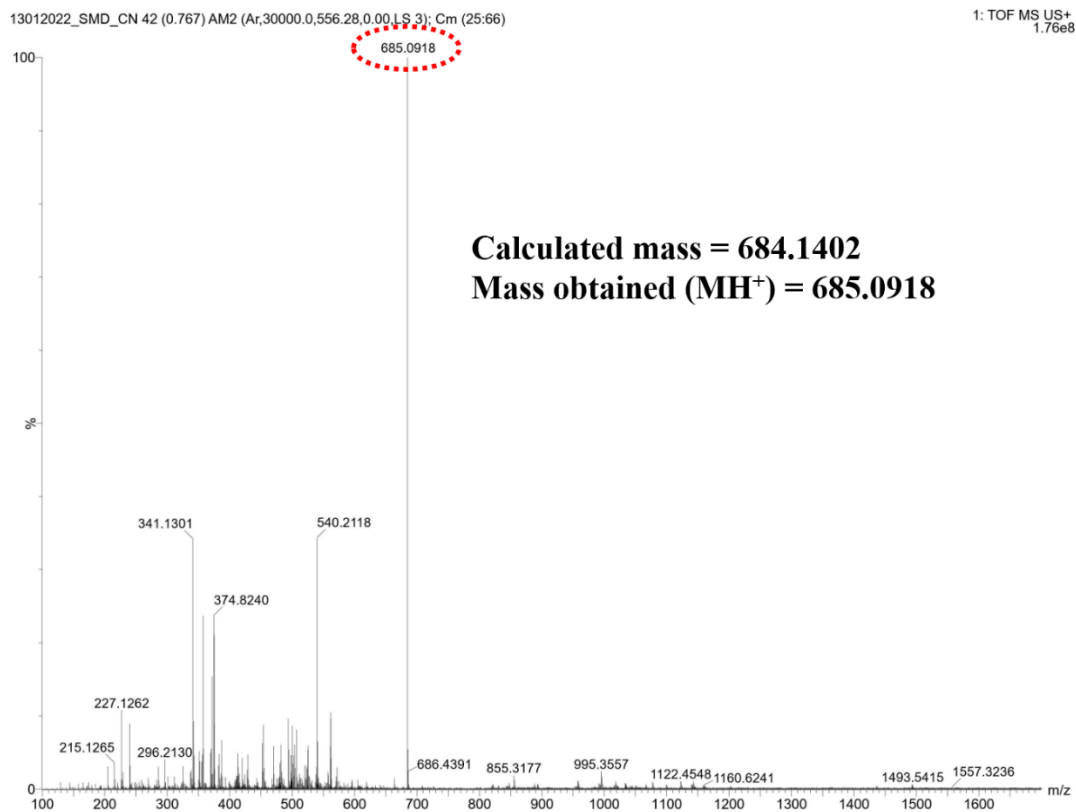

**Fig S6** HRMS spectra of PDBT+CN<sup>-</sup>.

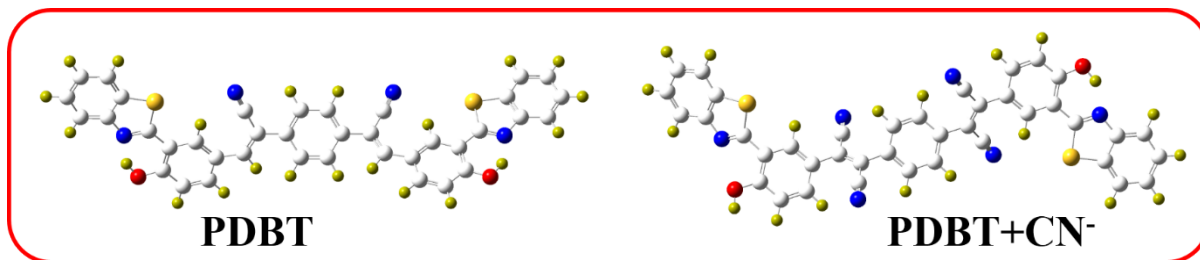

**Fig S7.** Optimized structures of PDBT and PDBT+CN<sup>-</sup>.

**Table S1.** Oscillator strengths of important transitions for the **PDBT** and **PDBT + CN<sup>-</sup>**.

| Entry                       | $\lambda$ max(nM) | Oscillatory strength | $\Delta E$ ,Energy(eV) | Selected major transitions                         |
|-----------------------------|-------------------|----------------------|------------------------|----------------------------------------------------|
| <b>PDBT</b>                 | 434.72            | 1.8799               | 18.7282                | H $\rightarrow$ L (47%)                            |
|                             | 370.21            | 0.0733               | 17.7472                | H $\rightarrow$ L <sub>2</sub> (42%)               |
|                             | 329.02            | 0.3664               | 14.9453                | H <sub>1</sub> $\rightarrow$ L <sub>1</sub> (30%)  |
|                             | 322.42            | 0.0675               | 16.3412                | H <sub>3</sub> $\rightarrow$ L (36%)               |
|                             | 317.54            | 0.0310               | 15.5306                | H <sub>5</sub> $\rightarrow$ L (32%)               |
|                             | 312.49            | 0.1017               | 18.2697                | H <sub>1</sub> $\rightarrow$ L <sub>3</sub> (45%)  |
| <b>PDBT+ CN<sup>-</sup></b> | 474.08            | 0.8540               | 18.7559                | H $\rightarrow$ L (47%)                            |
|                             | 402.98            | 0.0809               | 13.9161                | H $\rightarrow$ L <sub>1</sub> (26%)               |
|                             | 387.84            | 0.0018               | 18.4784                | H <sub>4</sub> $\rightarrow$ L (46%)               |
|                             | 351.68            | 0.0003               | 18.8697                | H <sub>2</sub> $\rightarrow$ L <sub>1</sub> (48%)  |
|                             | 303.12            | 0.1183               | 8.0216                 | H <sub>3</sub> $\rightarrow$ L <sub>2</sub> (8.6%) |
|                             | 302.85            | 0.0168               | 9.8015                 | H <sub>1</sub> $\rightarrow$ L <sub>2</sub> (12%)  |

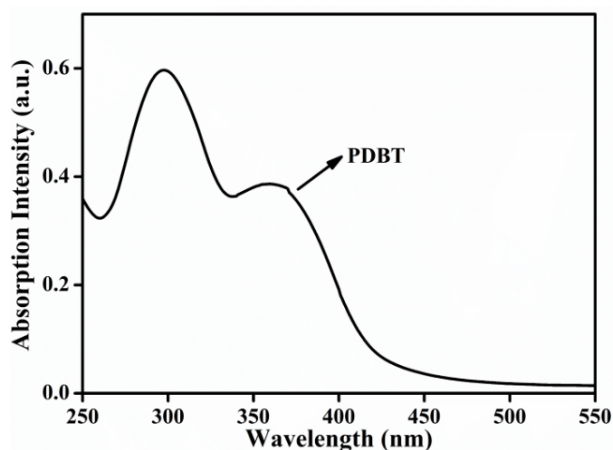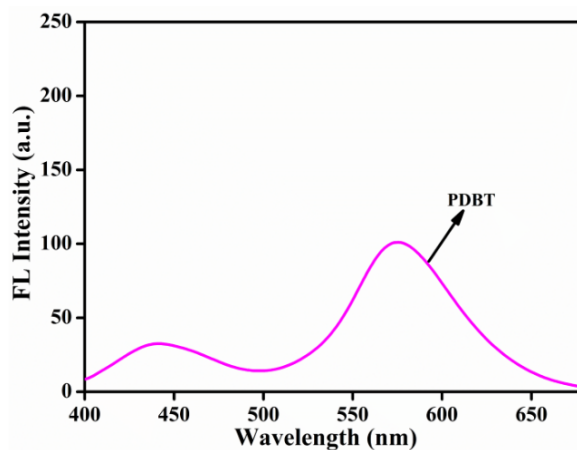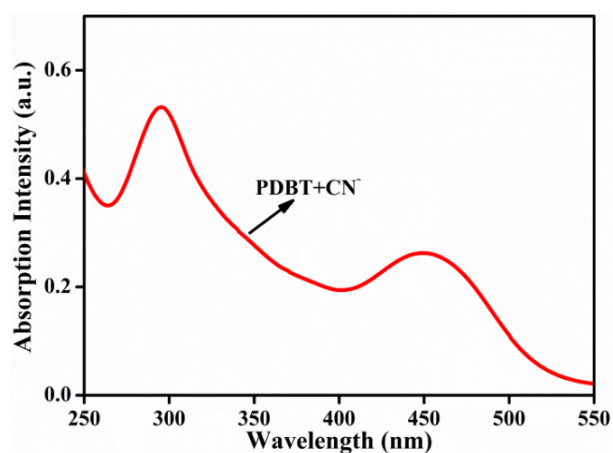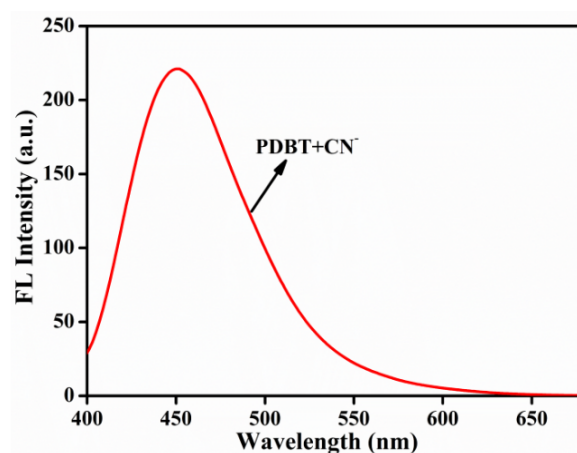



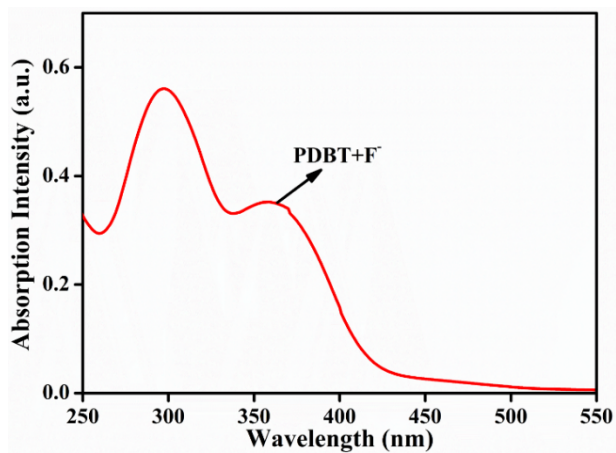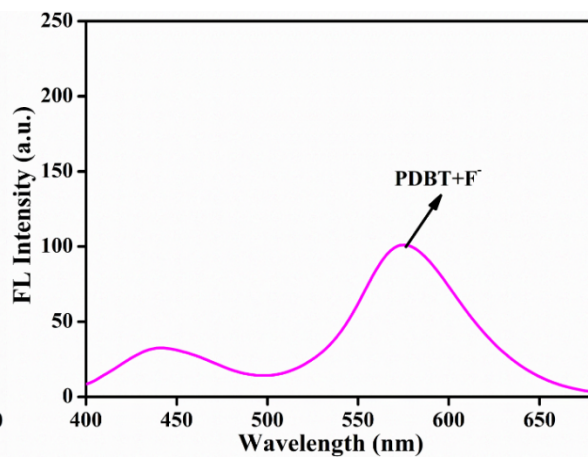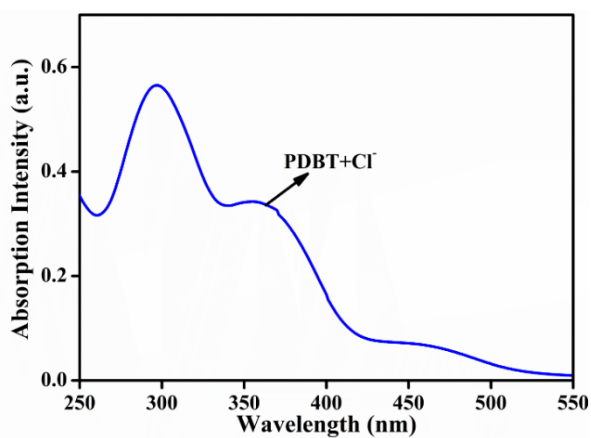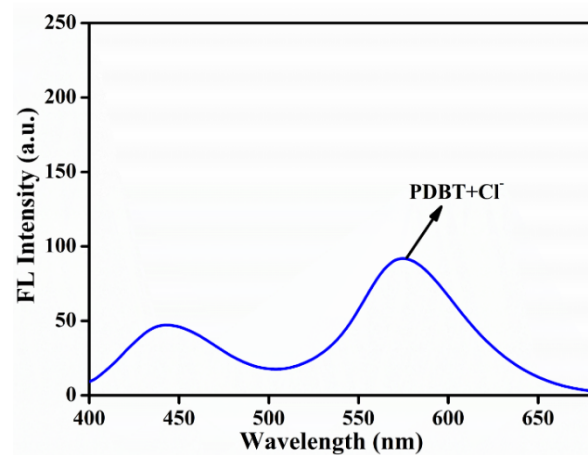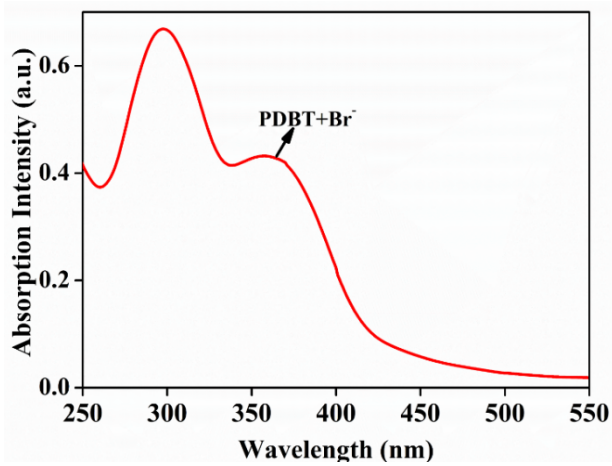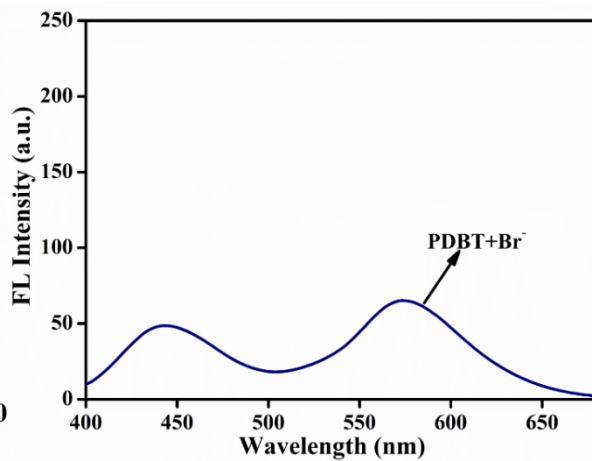

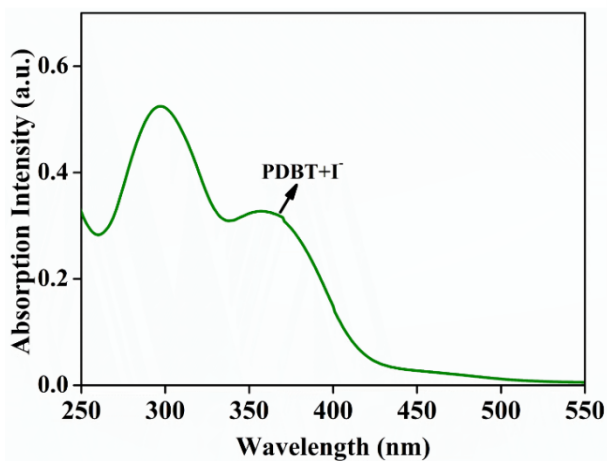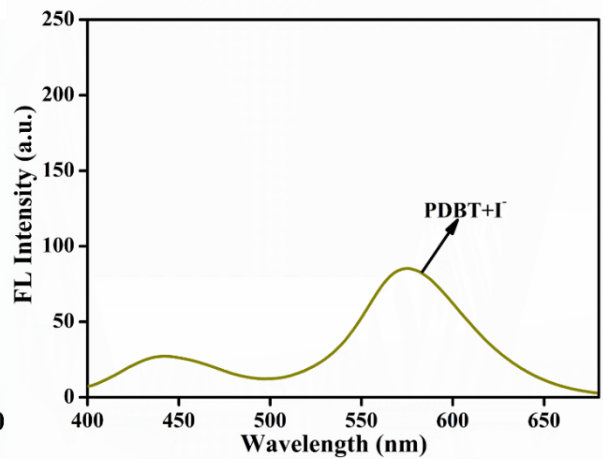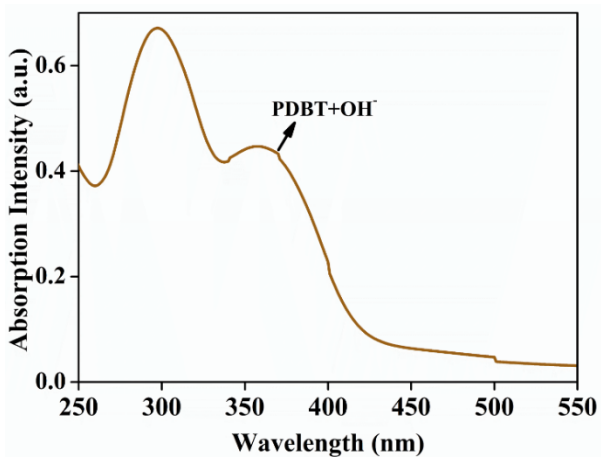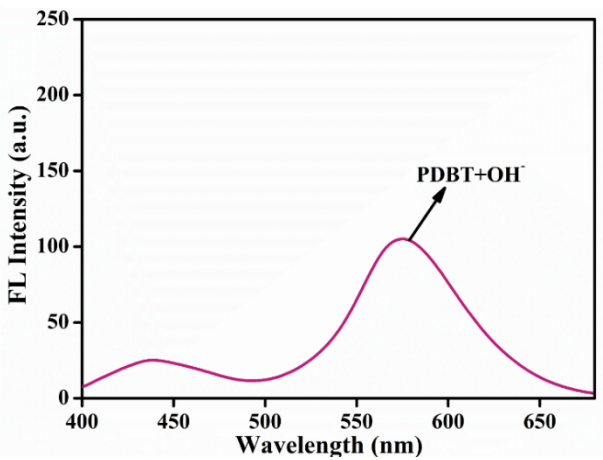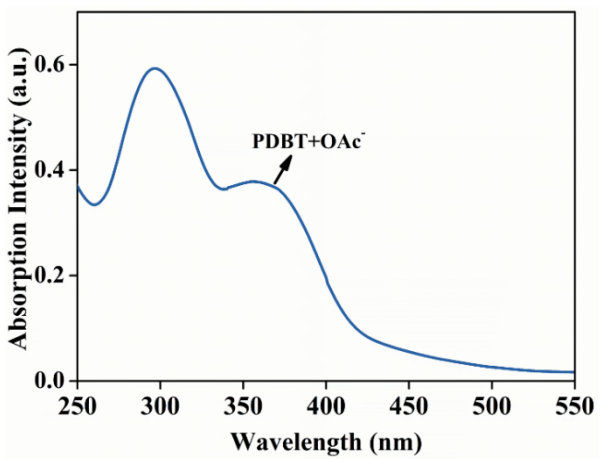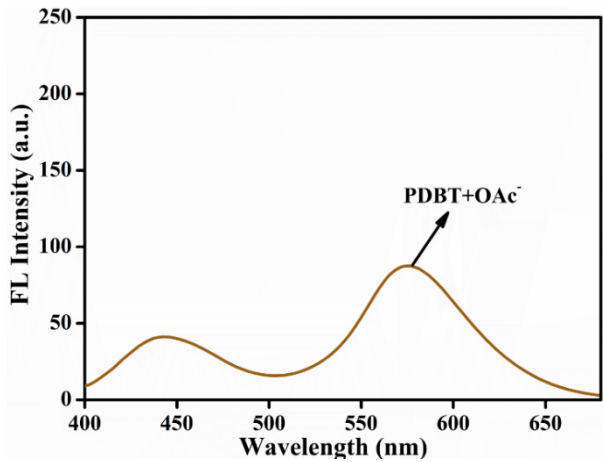



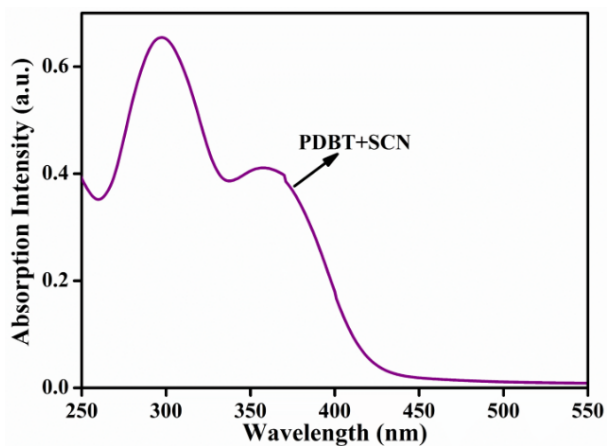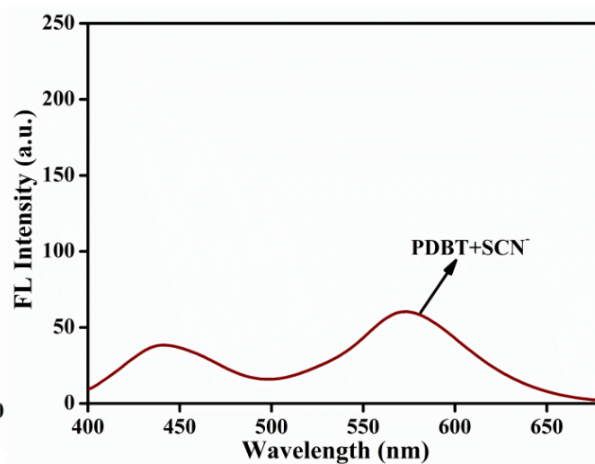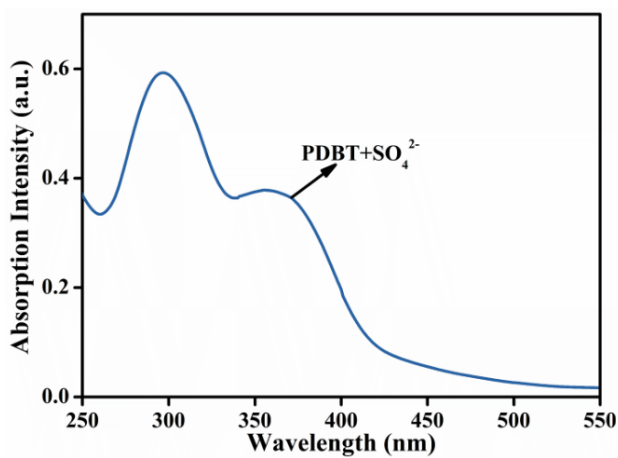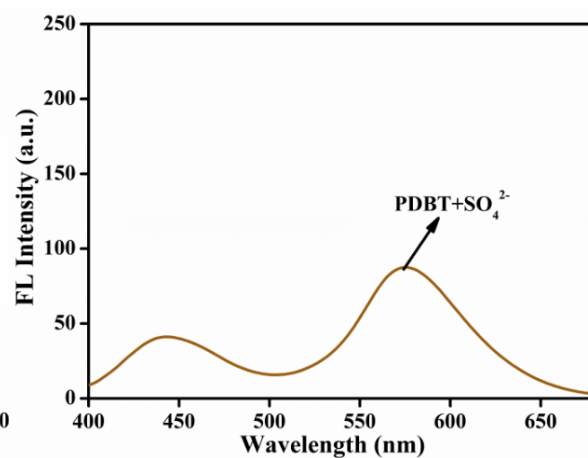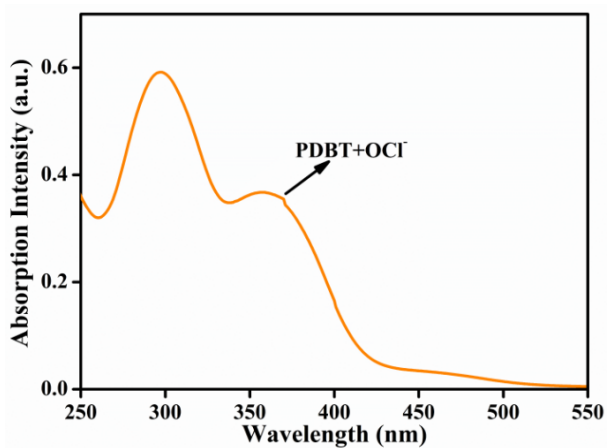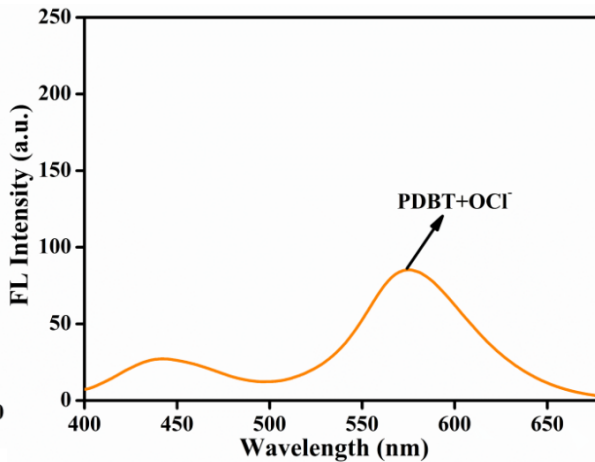

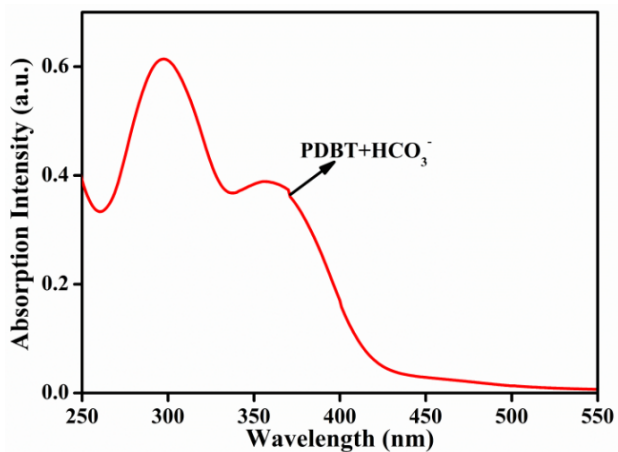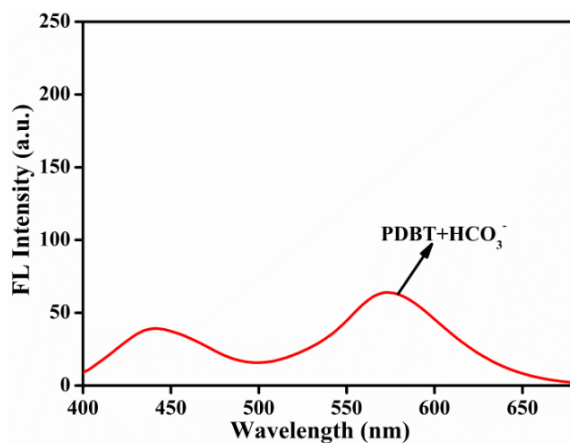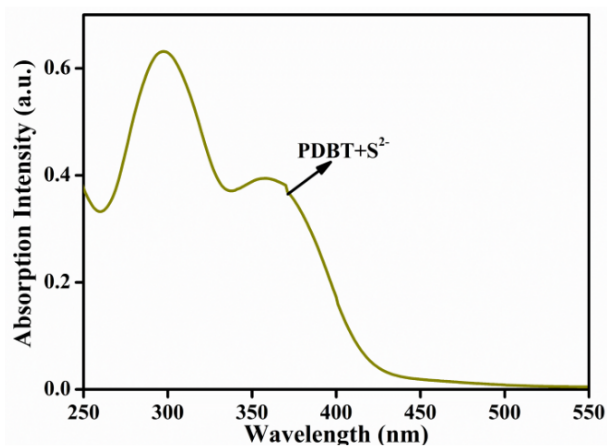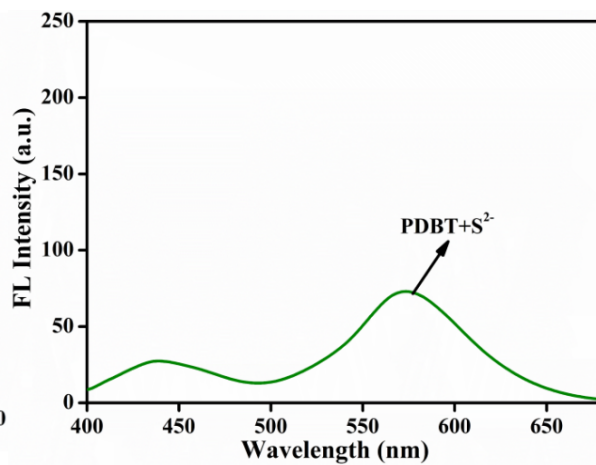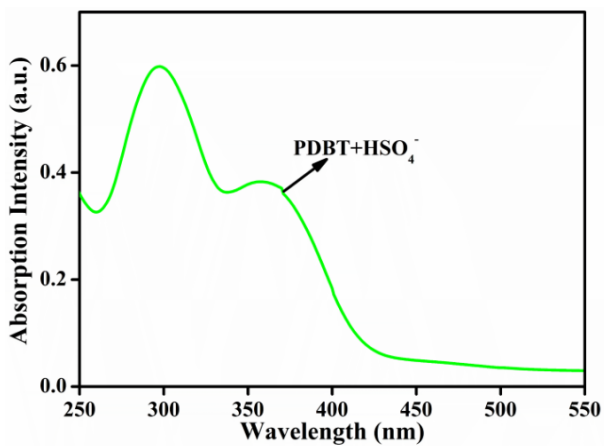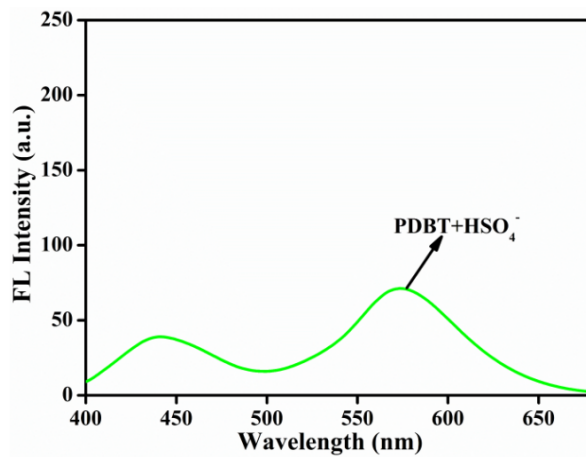

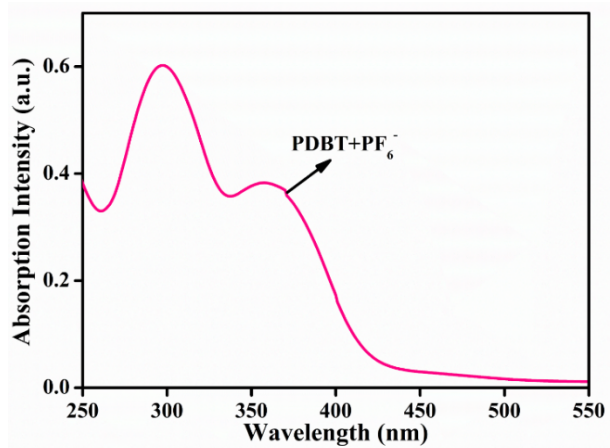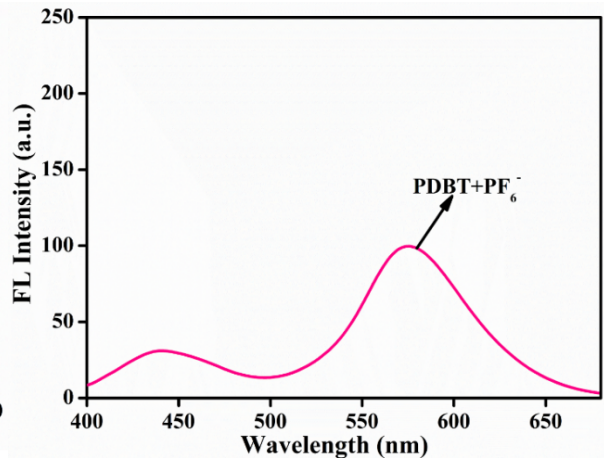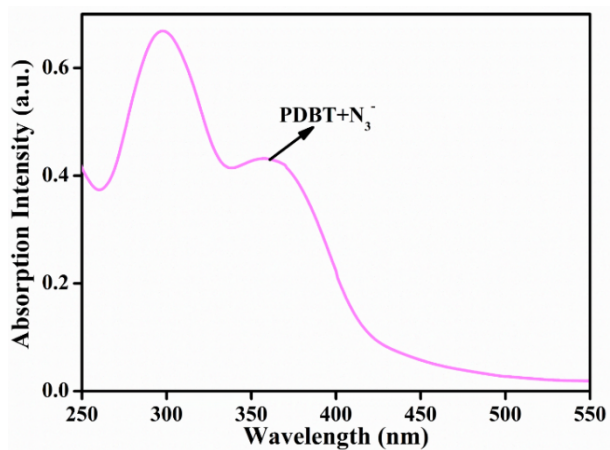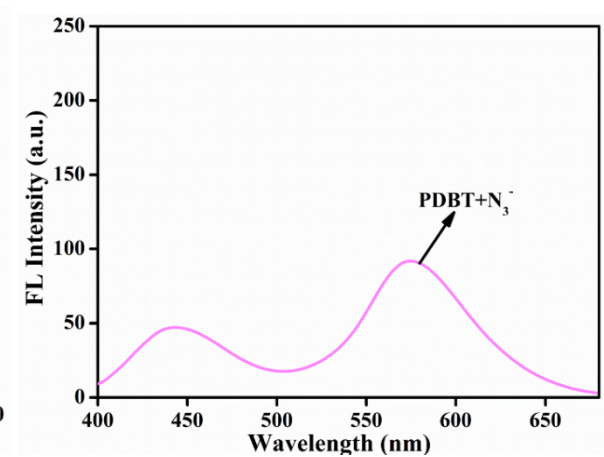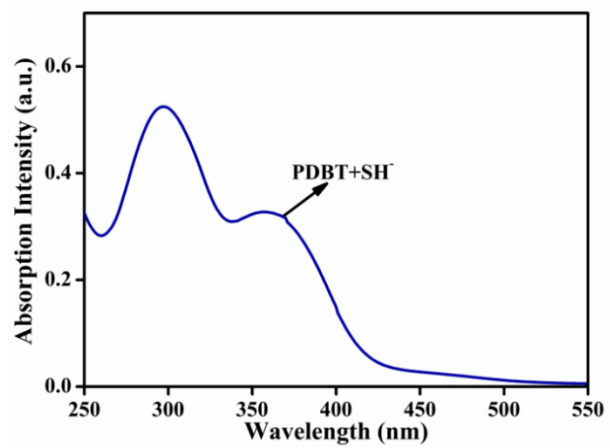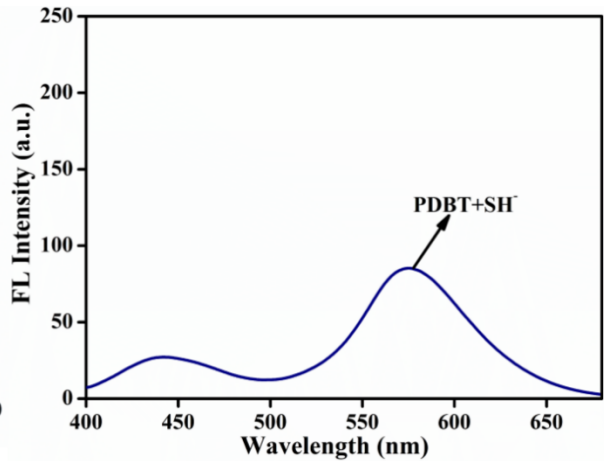

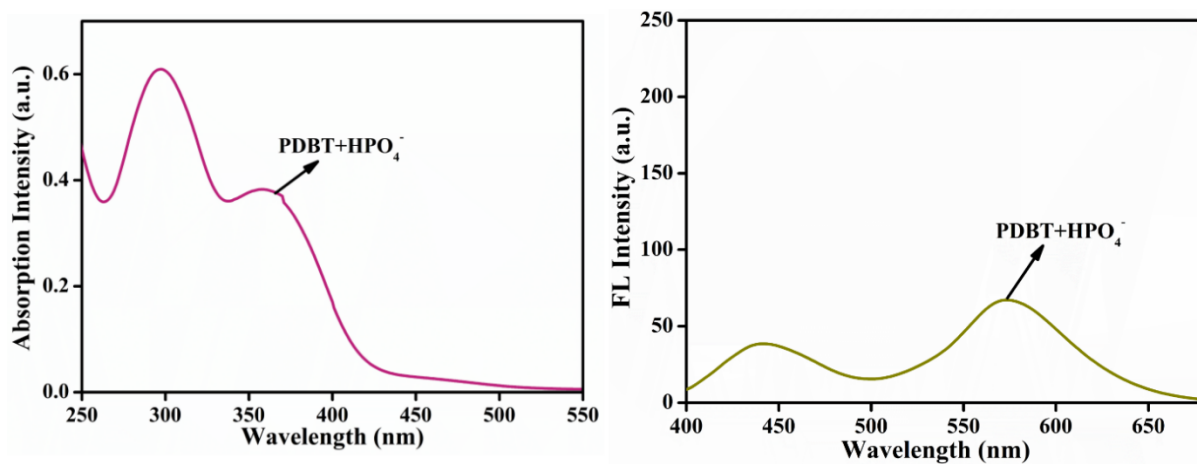

**Fig S8.** Individual electronic spectra of **PDBT** with various selective anions.

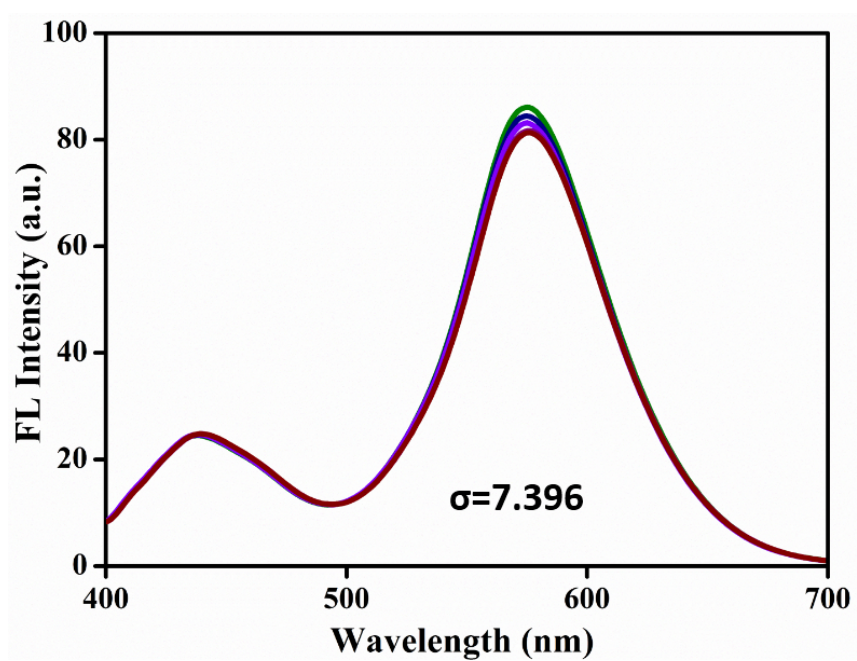

**Fig S9.** Standard deviation calculation spectra of **PDBT**.
